# Supplementary material for: Efficient extraction of gold from water by liquid–liquid extraction or precipitation using hydrophobic ionic liquids
Source: Royal Society of Chemistry journal article supplement (doi:10.1039/c4nj01115e), 2014-01-01
Supplement: c4nj01115e1.pdf [file c4nj01115e1.pdf]

**Efficient extraction of gold from water by liquid-liquid extraction or precipitation using hydrophobic ionic liquids.**

Stéphanie Boudesocque, Aminou Mohamadou and Laurent Dupont\*

**Supplementary Materials**

Elemental analysis of precipitates obtained from precipitation experiments and isolated for a ratio  $([\text{AlkylGBOEt}^+][\text{Br}^-]/\text{Au}) = 10$

|                                                                                    | % C        |              | % H        |              | % N        |              |
|------------------------------------------------------------------------------------|------------|--------------|------------|--------------|------------|--------------|
|                                                                                    | calculated | experimental | calculated | experimental | calculated | experimental |
| [EtGBOEt <sup>+</sup> ]<br>[AuCl <sub>3</sub> Br <sup>-</sup> ] H <sub>2</sub> O   | 18.71      | 18.61        | 3.81       | 3.42         | 2.42       | 2.25         |
| [PrGBOEt <sup>+</sup> ]<br>[AuCl <sub>3</sub> Br <sup>-</sup> ] 2 H <sub>2</sub> O | 27.75      | 28.04        | 4.91       | 4.50         | 2.02       | 1.76         |
| [BuGBOEt <sup>+</sup> ]<br>[AuCl <sub>3</sub> Br <sup>-</sup> ] 2 H <sub>2</sub> O | 21.96      | 22.16        | 4.27       | 3.95         | 2.13       | 2.04         |
